# Supplementary material for: Integrative Taxonomy of Armeria arenaria (Plumbaginaceae), with a Special Focus on the Putative Subspecies Endemic to the Apennines
Source: MDPI journal article supplement (doi:10.3390/biology11071060), 2022-07-14
Supplement: s1 [file s1]

## Supplementary Materials

**Table S1.** Shape of the leaf apex according to the second grouping hypothesis. A figure on the right is provided for comparison. Significance according to Fisher's exact test.

| SUM_LEAF_APEX | FB | marginatoid | arenarioid (FB excluded) |
|---------------|----|-------------|--------------------------|
| acute (A)     | 0  | 60          | 9                        |
| cucullate (B) | 23 | 10          | 123                      |
| significance  | a  | b           | a                        |

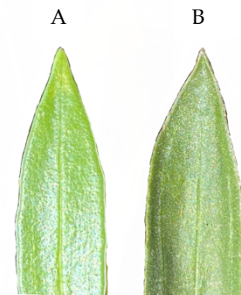

**Table S2.** Presence of teeth on summer leaf margins according to the second grouping hypothesis. Leaf margins are always hyaline, but in some cases uni- or pluri-cellular teeth emerge from the margin. Significance levels according to Fisher exact test.

| MAR_SUM_LEAF | FB | marginatoid | arenarioid (FB excluded) |
|--------------|----|-------------|--------------------------|
| no teeth     | 1  | 71          | 105                      |
| teeth        | 22 | 3           | 27                       |
| significance | a  | b           | c                        |

**Table S3.** Number of veins on summer leaves based in cross section, according to the second grouping hypothesis. Significance levels according to Fisher exact test.

| N_SUM_VEINS     | FB  | marginatoid | arenarioid (FB excluded) |
|-----------------|-----|-------------|--------------------------|
| 3               | 4%  | 88%         | 5%                       |
| 5               | 48% | 12%         | 29%                      |
| 7               | 48% | 0%          | 60%                      |
| 9               | 0%  | 0%          | 4%                       |
| 10              | 0%  | 0%          | 2%                       |
| individuals (n) | 23  | 74          | 129                      |
| Significance    | a   | b           | a                        |

**Table S4.** Mean and standard deviation values (mm) of quantitative characters for the twelve populations studied. Characters as in Table 2 and populations as in Table 1. \* = type locality.

| Character             | AA               | BO                | BR                | FB*                | GA                | LA*              | LL*               | MB*               | MC                | MP                | PS               | TV               |
|-----------------------|------------------|-------------------|-------------------|--------------------|-------------------|------------------|-------------------|-------------------|-------------------|-------------------|------------------|------------------|
| ANG_SUM_TIP           | 11.79 ±<br>3.95  | 13.71 ±<br>5.62   | 20.55 ±<br>7.03   | 16.96 ±<br>6.16    | 17.33 ±<br>7.41   | 10.8 ±<br>4.51   | 15.9 ±<br>6.51    | 15.55 ±<br>4.54   | 13.3 ±<br>4.0     | 21 ±<br>7.49      | 9.7 ±<br>2.98    | 17.6 ±<br>6.4    |
| ANG_WIN_TIP           | 18.15 ±<br>3.13  | 34.38 ±<br>7.8    | 33.8 ±<br>8.4     | 21.85 ±<br>6.76    | 31.67 ±<br>11.08  | 19.85 ±<br>4.9   | 26.35 ±<br>9.9    | 26.68 ±<br>6.55   | 18.5 ±<br>4.27    | 31.13 ±<br>15.07  | N/A              | 32.27 ±<br>11.18 |
| AWN_LENG              | 0.76 ±<br>0.11   | 1.02 ±<br>0.17    | 0.95 ±<br>0.16    | 1.04 ±<br>0.19     | 1.08 ±<br>0.2     | 0.82 ±<br>0.13   | 0.87 ±<br>0.18    | 0.76 ±<br>0.2     | 0.91 ±<br>0.18    | 0.93 ±<br>0.21    | 1.01 ±<br>0.35   | 0.95 ±<br>0.21   |
| DIAM_CAP              | 17.95 ±<br>2.04  | 16.46 ±<br>1.63   | 17.29 ±<br>1.58   | 13.85 ±<br>1.5     | 15.53 ±<br>0.96   | 19.18 ±<br>1.27  | 15.59 ±<br>1.19   | 19.08 ±<br>1.41   | 18.7 ±<br>1.43    | 15.23 ±<br>1.89   | 18.48 ±<br>2.25  | 17.98 ±<br>1.4   |
| HEIGHT                | 327.5 ±<br>65.01 | 430.71 ±<br>80.76 | 430.95 ±<br>74.03 | 446.57 ±<br>109.38 | 452.28 ±<br>76.51 | 300.8 ±<br>45.82 | 498.8 ±<br>74.42  | 318.15 ±<br>61.72 | 252.65 ±<br>52.32 | 340.75 ±<br>62.72 | 429.3 ±<br>59.19 | 446.2 ±<br>55.01 |
| LENG_CAL_PED          | 1.99 ±<br>0.64   | 1.3 ±<br>0.43     | 1.83 ±<br>0.58    | 1.41 ±<br>0.6      | 1.24 ±<br>0.3     | 2.18 ±<br>0.48   | 1.76 ±<br>0.48    | 2.19 ±<br>0.71    | 1.86 ±<br>0.69    | 1.31 ±<br>0.31    | 2.26 ±<br>0.56   | 1.46 ±<br>0.5    |
| LENG_CAL_TUBE         | 3.45 ±<br>0.24   | 3.37 ±<br>0.28    | 3.1 ±<br>0.36     | 2.84 ±<br>0.22     | 3.3 ±<br>0.28     | 3.36 ±<br>0.23   | 3.14 ±<br>0.19    | 3.27 ±<br>0.37    | 3.16 ±<br>0.35    | 3.02 ±<br>0.29    | 3.42 ±<br>0.31   | 3.36 ±<br>0.27   |
| LENG_INNER_INV_BRACT  | 7.73 ±<br>0.83   | 7.09 ±<br>0.77    | 6.95 ±<br>0.69    | 5.29 ±<br>0.91     | 6.37 ±<br>0.76    | 7.9 ±<br>1.19    | 6.87 ±<br>0.77    | 9.29 ±<br>0.9     | 7.95 ±<br>1.06    | 6.39 ±<br>0.96    | 7.62 ±<br>0.8    | 6.64 ±<br>0.89   |
| LENG_INNER_SPI_BRACLE | 6.42 ±<br>1.16   | 4.71 ±<br>0.67    | 4.8 ±<br>0.52     | 4.01 ±<br>0.52     | 3.68 ±<br>0.61    | 5.93 ±<br>1.02   | 4.55 ±<br>0.62    | 5.79 ±<br>1.0     | 5.72 ±<br>1.28    | 4.15 ±<br>0.52    | 5.37 ±<br>0.75   | 4.65 ±<br>0.87   |
| LENG_INNER_SPI_BRACT  | 8.76 ±<br>0.92   | 7.09 ±<br>0.61    | 7.41 ±<br>0.67    | 6.0 ±<br>0.61      | 6.36 ±<br>0.49    | 8.7 ±<br>0.84    | 6.9 ±<br>0.53     | 8.81 ±<br>0.81    | 8.67 ±<br>1.22    | 6.46 ±<br>0.86    | 7.65 ±<br>0.84   | 7.44 ±<br>0.76   |
| LENG_INTER_INV_BRACT  | 7.31 ±<br>0.99   | 6.63 ±<br>0.98    | 5.97 ±<br>0.68    | 3.96 ±<br>0.81     | 5.73 ±<br>0.47    | 7.53 ±<br>1.27   | 5.75 ±<br>0.76    | 8.77 ±<br>1.29    | 7.28 ±<br>1.43    | 5.83 ±<br>1.03    | 6.79 ±<br>0.77   | 5.68 ±<br>0.94   |
| LENG_OUT_INV_BRACT    | 7.46 ±<br>1.58   | 10.92 ±<br>4.32   | 8.56 ±<br>1.75    | 10.4 ±<br>6.78     | 7.83 ±<br>1.72    | 6.8 ±<br>1.55    | 8.77 ±<br>1.85    | 7.06 ±<br>1.87    | 6.33 ±<br>1.33    | 9.22 ±<br>3.51    | 7.35 ±<br>1.62   | 6.88 ±<br>1.41   |
| LENG_OUTER_SPI_BRACLE | 6.17 ±<br>0.97   | 4.6 ±<br>0.49     | 4.62 ±<br>0.54    | 4.03 ±<br>0.39     | 3.54 ±<br>0.57    | 5.56 ±<br>0.95   | 4.68 ±<br>0.41    | 5.64 ±<br>0.93    | 5.76 ±<br>1.12    | 4.04 ±<br>0.61    | 5.25 ±<br>0.76   | 4.7 ±<br>0.76    |
| LENG_OUTER_SPI_BRACT  | 8.38 ±<br>0.79   | 6.8 ±<br>0.54     | 7.04 ±<br>0.58    | 5.4 ±<br>0.52      | 6.06 ±<br>0.57    | 8.21 ±<br>0.63   | 6.48 ±<br>0.48    | 8.4 ±<br>0.69     | 8.12 ±<br>0.91    | 5.93 ±<br>0.83    | 7.17 ±<br>0.95   | 7.18 ±<br>0.73   |
| LENG_SUM_LEAF         | 71.56 ±<br>32.74 | 111.16 ±<br>27.2  | 95.52 ±<br>23.61  | 84.23 ±<br>28.95   | 102.28 ±<br>24.39 | 70.85 ±<br>21.05 | 102.28 ±<br>24.82 | 82.17 ±<br>39.33  | 61.71 ±<br>25.92  | 79.68 ±<br>27.34  | 112.45 ±<br>38.1 | 98.21 ±<br>25.52 |
| LENG_WIN_LEAF         | 39.95 ±<br>13.04 | 46.6 ±<br>13.57   | 60.71 ±<br>27.76  | 50.63 ±<br>31.29   | 61.58 ±<br>11.35  | 43.76 ±<br>17.55 | 52.37 ±<br>24.44  | 35.31 ±<br>11.36  | 30.36 ±<br>9.58   | 36.23 ±<br>10.95  | N/A              | 46.65 ±<br>19.82 |

| Character                   | AA                | BO                | BR                | FB*                | GA                | LA*               | LL*               | MB*              | MC                | MP                | PS                | TV               |
|-----------------------------|-------------------|-------------------|-------------------|--------------------|-------------------|-------------------|-------------------|------------------|-------------------|-------------------|-------------------|------------------|
| LIMB_LEN                    | 2.65 ±<br>0.21    | 2.14 ±<br>0.21    | 2.27 ±<br>0.24    | 1.81 ±<br>0.26     | 1.92 ±<br>0.21    | 2.44 ±<br>0.18    | 2.07 ±<br>0.17    | 2.79 ±<br>0.26   | 2.73 ±<br>0.31    | 1.75 ±<br>0.28    | 2.17 ±<br>0.27    | 2 ± 0.32         |
| SCA_DIAM                    | 1.08 ±<br>0.14    | 1.5 ±<br>0.25     | 1.27 ±<br>0.18    | 1.4 ±<br>0.33      | 1.21 ±<br>0.18    | 1.57 ±<br>0.35    | 1.66 ±<br>0.21    | 1.24 ±<br>0.23   | 1.35 ±<br>0.26    | 1.28 ±<br>0.15    | 1.44 ±<br>0.23    | 1.42 ±<br>0.23   |
| SCA_LEN                     | 305.29 ±<br>71.96 | 399.14 ±<br>70.96 | 404.75 ±<br>78.11 | 406.13 ±<br>113.29 | 430.61 ±<br>75.23 | 266.63 ±<br>39.09 | 485.15 ±<br>66.09 | 292.8 ±<br>73.63 | 213.75 ±<br>47.96 | 281.35 ±<br>80.97 | 402.75 ±<br>73.02 | 427.5 ±<br>60.86 |
| SHEATH_LEN                  | 17 ± 2.5          | 34.34 ±<br>6.01   | 28.92 ±<br>4.69   | 21.24 ±<br>10.47   | 24.93 ±<br>7.5    | 19.32 ±<br>4.06   | 33.68 ±<br>7.24   | 16.49 ±<br>4.19  | 14.84 ±<br>3.38   | 23.48 ±<br>6.85   | 24.93 ±<br>3.9    | 28.22 ±<br>5.24  |
| WIDTH_CAL_TUBE              | 1.07 ±<br>0.15    | 1.08 ±<br>0.14    | 0.98 ±<br>0.14    | 0.72 ±<br>0.15     | 1.01 ±<br>0.15    | 1.14 ±<br>0.15    | 0.88 ±<br>0.11    | 0.99 ±<br>0.16   | 1.11 ±<br>0.17    | 0.97 ±<br>0.12    | 1.02 ±<br>0.18    | 1.11 ±<br>0.15   |
| WIDTH_IAL_SUM               | 0.08 ±<br>0.02    | 0.09 ±<br>0.02    | 0.07 ±<br>0.02    | 0.07 ±<br>0.02     | 0.08 ±<br>0.02    | 0.12 ±<br>0.02    | 0.06 ±<br>0.02    | 0.1 ±<br>0.02    | 0.11 ±<br>0.02    | 0.09 ±<br>0.02    | 0.07 ±<br>0.02    | 0.06 ±<br>0.01   |
| WIDTH_IAL_WIN               | 0.12 ±<br>0.07    | 0.11 ±<br>0.02    | 0.1 ±<br>0.03     | 0.09 ±<br>0.02     | 0.09 ±<br>0.02    | 0.13 ±<br>0.03    | 0.08 ±<br>0.02    | 0.12 ±<br>0.02   | 0.12 ±<br>0.02    | 0.09 ±<br>0.02    | NA                | 0.08 ±<br>0.02   |
| WIDTH_INNER_INV_BRAC        | 4.19 ±<br>0.78    | 4.78 ±<br>0.88    | 4.17 ±<br>0.75    | 3.7 ±<br>0.62      | 3.67 ±<br>0.88    | 5.04 ±<br>0.91    | 4.08 ±<br>0.62    | 5.02 ±<br>0.72   | 4.15 ±<br>1.11    | 4.61 ±<br>0.98    | 3.69 ±<br>0.57    | 4.65 ±<br>0.62   |
| WIDTH_INNER_SPI_BRAC<br>LE  | 2.51 ±<br>0.55    | 3.01 ±<br>0.44    | 2.32 ±<br>0.3     | 2.35 ±<br>0.3      | 2.38 ±<br>0.51    | 2.53 ±<br>0.48    | 2.78 ±<br>0.42    | 2.68 ±<br>0.76   | 2.16 ±<br>0.8     | 2.59 ±<br>0.43    | 2.74 ±<br>0.52    | 2.86 ±<br>0.31   |
| WIDTH_INNER_SPI_BRAC        | 5.49 ±<br>0.65    | 5.42 ±<br>0.65    | 4.43 ±<br>0.77    | 4 ± 0.37           | 4.12 ±<br>0.84    | 5.64 ±<br>0.8     | 4.49 ±<br>0.58    | 6.23 ±<br>0.73   | 5.84 ±<br>0.72    | 4.86 ±<br>0.49    | 4.89 ±<br>0.94    | 5.55 ±<br>0.83   |
| WIDTH_INTER_INV_BRAC        | 4.34 ±<br>1.18    | 4.79 ±<br>0.9     | 3.31 ±<br>0.74    | 3.43 ±<br>0.6      | 3.59 ±<br>0.75    | 4.11 ±<br>0.96    | 4.83 ±<br>0.9     | 5.26 ±<br>1.14   | 3.91 ±<br>0.79    | 4.15 ±<br>0.58    | 3.44 ±<br>0.73    | 4.44 ±<br>0.76   |
| WIDTH_OUT_INV_BRAC          | 2.98 ±<br>0.68    | 3.19 ±<br>0.59    | 2.36 ±<br>0.37    | 2.7 ±<br>0.58      | 2.78 ±<br>0.65    | 2.45 ±<br>0.7     | 3.41 ±<br>0.6     | 3.15 ±<br>0.8    | 2.37 ±<br>0.7     | 3.14 ±<br>0.59    | 2.69 ±<br>0.59    | 2.98 ±<br>0.53   |
| WIDTH_OUTER_SPI_BRAC        | 5.14 ±<br>0.43    | 5.79 ±<br>0.63    | 4.65 ±<br>0.65    | 4.2 ±<br>0.48      | 4.1 ± 0.6         | 5.72 ±<br>0.89    | 4.39 ±<br>0.56    | 5.77 ±<br>0.97   | 5.7 ±<br>0.74     | 4.81 ±<br>0.47    | 4.58 ±<br>1.03    | 5.49 ±<br>0.7    |
| WIDTH_OUTER_SPI_BRATL<br>LE | 2.39 ±<br>0.34    | 2.9 ±<br>0.42     | 2.31 ±<br>0.29    | 2.41 ±<br>0.29     | 2.5 ±<br>0.48     | 2.37 ±<br>0.43    | 2.86 ±<br>0.47    | 2.7 ±<br>0.77    | 2.26 ±<br>0.75    | 2.7 ±<br>0.45     | 2.68 ±<br>0.74    | 2.83 ±<br>0.39   |
| WIDTH_SUM_LEAF              | 2.17 ±<br>0.63    | 4.36 ±<br>1.03    | 3.47 ±<br>1.28    | 2.94 ±<br>0.97     | 3.78 ±<br>1.11    | 2.86 ±<br>0.56    | 3.64 ±<br>1.01    | 2.52 ±<br>0.68   | 2.52 ±<br>0.67    | 3.88 ±<br>1.43    | 2.27 ±<br>0.68    | 3.14 ±<br>0.69   |
| WIDTH_WIN_LEAF              | 3.11 ±<br>0.78    | 5.16 ±<br>0.85    | 4.66 ±<br>0.93    | 3.85 ±<br>1.23     | 5.43 ±<br>1.6     | 4.63 ±<br>0.65    | 5.63 ±<br>1.74    | 3.78 ±<br>0.68   | 3.31 ±<br>0.79    | 4.23 ±<br>1.4     | NA                | 4 ± 0.83         |

**Table S5.** Median and inter-quartile range of quantitative discrete characters for the twelve populations studied. Characters as in Table 2 and populations as in Table 1. \* = type locality.

| <b>Character</b> | <b>AA</b> | <b>BO</b>  | <b>BR</b>  | <b>FB*</b> | <b>GA</b> | <b>LA*</b> | <b>LL*</b> | <b>MB*</b> | <b>MC</b>  | <b>MP</b> | <b>PS</b> | <b>TV</b>  |
|------------------|-----------|------------|------------|------------|-----------|------------|------------|------------|------------|-----------|-----------|------------|
| SCAP_NUM         | 2 ± 3.5   | 3,5 ± 1.75 | 5,5 ± 5.25 | 8 ± 10.5   | 2 ± 2.75  | 5,5 ± 7.25 | 15 ± 32.5  | 8 ± 8.5    | 5 ± 4.5    | 6,5 ± 5   | 4 ± 5     | 4 ± 3.75   |
| N_INV_BRACT      | 11 ± 2.75 | 13 ± 2     | 13 ± 3.25  | 16 ± 3.5   | 14 ± 4    | 13 ± 2.25  | 15 ± 2     | 13 ± 3     | 14,5 ± 2.5 | 14 ± 4    | 10 ± 2    | 13.5 ± 2.5 |
| N_SUM_VEINS      | 3 ± 0     | 6 ± 2      | 7 ± 0      | 5 ± 2      | 7 ± 2     | 3 ± 0.5    | 7 ± 2      | 3 ± 0      | 3 ± 0      | 7 ± 2     | 7 ± 2     | 7 ± 2      |
| N_WIN_VEINS      | 3 ± 0     | 5 ± 2.25   | 7 ± 2      | 3 ± 2      | 6 ± 2     | 3 ± 2      | 5 ± 4      | 3 ± 1      | 3 ± 2      | 5 ± 2     | NA        | 5 ± 2      |

**Table S6.** Mean and standard deviation of the karyological indices in *Armeria arenaria* from the twelve studied populations. Indices names as in the main text; *n* = number of studied metaphasic plates. Population codes as in Table 1. \* = type locality.

| Population | <i>n</i> | THL          | M <sub>CA</sub> | CV <sub>CL</sub> | CV <sub>CI</sub> |
|------------|----------|--------------|-----------------|------------------|------------------|
| AA         | 4        | 42.98 ± 3.98 | 27.42 ± 2.19    | 17.16 ± 1.69     | 14.44 ± 0.63     |
| BO         | 5        | 40.52 ± 3.89 | 26.25 ± 0.88    | 17.12 ± 3.22     | 14.82 ± 2.68     |
| BR         | 6        | 37.08 ± 3.41 | 25.57 ± 0.85    | 16.15 ± 2.16     | 12.49 ± 1.99     |
| FB*        | 4        | 42.04 ± 2.22 | 23.51 ± 2.86    | 16.26 ± 4.79     | 10.74 ± 2.04     |
| GA         | 6        | 45.37 ± 7.80 | 26.61 ± 1.65    | 16.86 ± 4.01     | 13.54 ± 1.89     |
| LL*        | 4        | 42.04 ± 2.68 | 25.73 ± 2.51    | 16.12 ± 2.34     | 15.65 ± 3.47     |
| LA*        | 4        | 48.37 ± 6.33 | 28.78 ± 1.21    | 18.84 ± 2.09     | 15.22 ± 2.58     |
| MC         | 4        | 48.88 ± 4.76 | 27.12 ± 2.43    | 18.22 ± 1.29     | 15.93 ± 2.52     |
| MB*        | 4        | 46.16 ± 6.75 | 27.85 ± 2.48    | 18.76 ± 2.44     | 15.08 ± 0.85     |
| MP         | 7        | 37.64 ± 5.22 | 22.78 ± 1.76    | 17.19 ± 2.62     | 14.05 ± 2.83     |
| PS         | 7        | 41.71 ± 5.38 | 25.01 ± 2.79    | 18.31 ± 1.97     | 15.88 ± 2.22     |
| TV         | 6        | 39.54 ± 1.89 | 23.44 ± 2.37    | 16.82 ± 4.03     | 12.06 ± 2.75     |

**Table S7.** List of molecular markers and their primers.

| Marker            | Primer<br>(F-R)             | Sequence (5'→3')                  | References |
|-------------------|-----------------------------|-----------------------------------|------------|
| <i>ITS</i>        | JK14                        | GGA GAA GTC GTA ACA AGG TTT CCG   | [50]       |
|                   | JK12                        | CCA AAC AAC CCG ACT CGT AGA CAG C |            |
| <i>trnF-trnL</i>  | trnF <sup>(GAA)</sup> IGS_f | GGT TCA AGT CCC TCT ATC CC        | [51]       |
|                   | trnF <sup>(GAA)</sup> IGS_r | ATT TGA ACT GGT GAC ACG AG        |            |
| <i>trnH-psbA</i>  | psbA                        | GTT ATG CAT GAA CGT AAT GCT C     |            |
|                   | trnH <sup>(GUG)</sup>       | CGC GCA TGG TGG ATT CAC AAT CC    |            |
| <i>trnQ-rps16</i> | trnQ <sup>(UUG)</sup>       | GCG TGG CCA AGY GGT AAG GC        | [52]       |
|                   | rpS16x1                     | GTT GCT TTY TAC CAC ATC GTT T     |            |
| <i>rpl32-trnL</i> | trnL <sup>(UAG)</sup>       | CTG CTT CCT AAG AGC AGC GT        |            |
|                   | rpL32-F                     | CAG TTC CAA AAA AAC GTA CTT C     |            |

**Table S8.** PCR settings used.

| Step             | Phase                | <i>ITS</i> |       | <i>trnQ-rps16</i> |       | <i>trnH-psbA; trnL-F</i> |       | <i>trnL-rpl32</i> |       |
|------------------|----------------------|------------|-------|-------------------|-------|--------------------------|-------|-------------------|-------|
|                  |                      | T°C        | t     | T°C               | t     | T°C                      | t     | T°C               | t     |
| 1                | Initial denaturation | 95         | 3 min | 95                | 3 min | 95                       | 3 min | 95                | 3 min |
| 2<br>(35 cycles) | Denaturation         | 95         | 30 s  | 95                | 30 s  | 95                       | 30 s  | 95                | 30 s  |
|                  | Annealing            | 62         | 30 s  | 53                | 30 s  | 55                       | 30 s  | 53                | 30 s  |
|                  | Extension            | 72         | 90 s  | 72                | 60 s  | 72                       | 35 s  | 72                | 90 s  |
| 3                | Extension            | 72         | 7 min | 72                | 3 min | 72                       | 60 s  | 72                | 7 min |

**Table S9.** Number of phylogenetically informative characters per marker and for the concatenated matrix.

| Marker              | Length (bp)            | Consensus length (bp) | N. phylogenetically informative characters |
|---------------------|------------------------|-----------------------|--------------------------------------------|
| <i>ITS</i>          | 804                    | 804                   | 11                                         |
| <i>ITS1</i>         | 194                    | 194                   | 2                                          |
| <i>5,8S</i>         | 156                    | 156                   | --                                         |
| <i>ITS2</i>         | 256 (454) <sup>1</sup> | 256 (454)             | 7 (2)                                      |
| <i>trnF-trnL</i>    | 311                    | 311                   | 4                                          |
| <i>trnH-psbA</i>    | 320                    | 320                   | 7                                          |
| <i>trnL-rpl32</i>   | 566-570                | 571                   | 13                                         |
| <i>trnQ-rps16</i>   | 329-330                | 330                   | 1                                          |
| Concatenated matrix | ----                   | 2337                  | 36                                         |

**Table S10.** IDL test results ( $\alpha < 0.05$ ).

|                       | <i>ITS</i> | <i>trnF-trnL</i> | <i>trnH-psbA</i> | <i>trnL-rpl32</i> | <i>trnQ-rps16</i> | <i>Plastid</i> |
|-----------------------|------------|------------------|------------------|-------------------|-------------------|----------------|
| <i>ITS</i>            | NA         | 0.06             | 0.1              | 0.01              | 1.0               | 0.01           |
| <i>trnF-trnL</i>      |            | NA               | 0.82             | 1.0               | 0.73              | -              |
| <i>trnH-psbA</i>      |            |                  | NA               | 0.37              | 0.07              | -              |
| <i>trnL-rpl32</i>     |            |                  |                  | NA                | 0.43              | -              |
| <i>trnQ-rps16</i>     |            |                  |                  |                   | NA                | -              |
| <i>Plastid</i>        |            |                  |                  |                   |                   | NA             |
| <i>trnF+trnH</i>      | 0.1        |                  |                  |                   |                   |                |
| <i>trnF+trnH+trnQ</i> | 0.09       |                  |                  |                   |                   |                |
| <i>trnH+trnL+trnQ</i> | 0.01       |                  |                  |                   |                   |                |

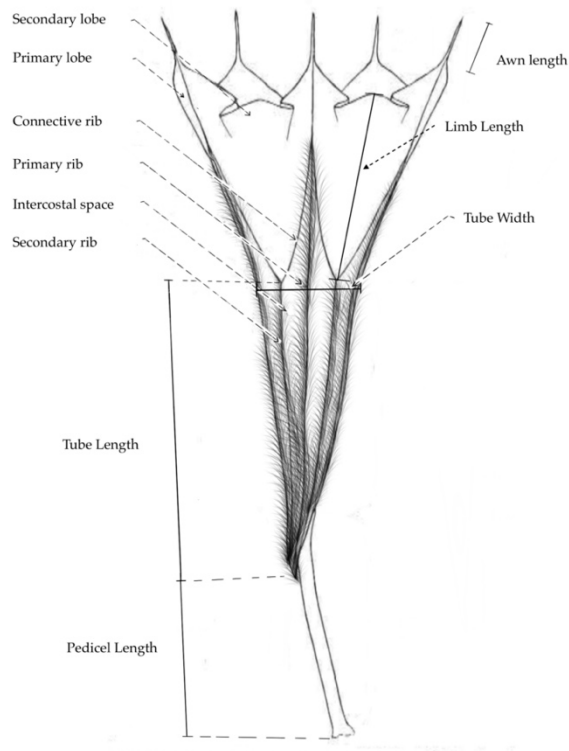

**Figure S1.** Schematic drawing of a calyx and related morphometric characters measured. (Figure from Lawrence [30], modified).

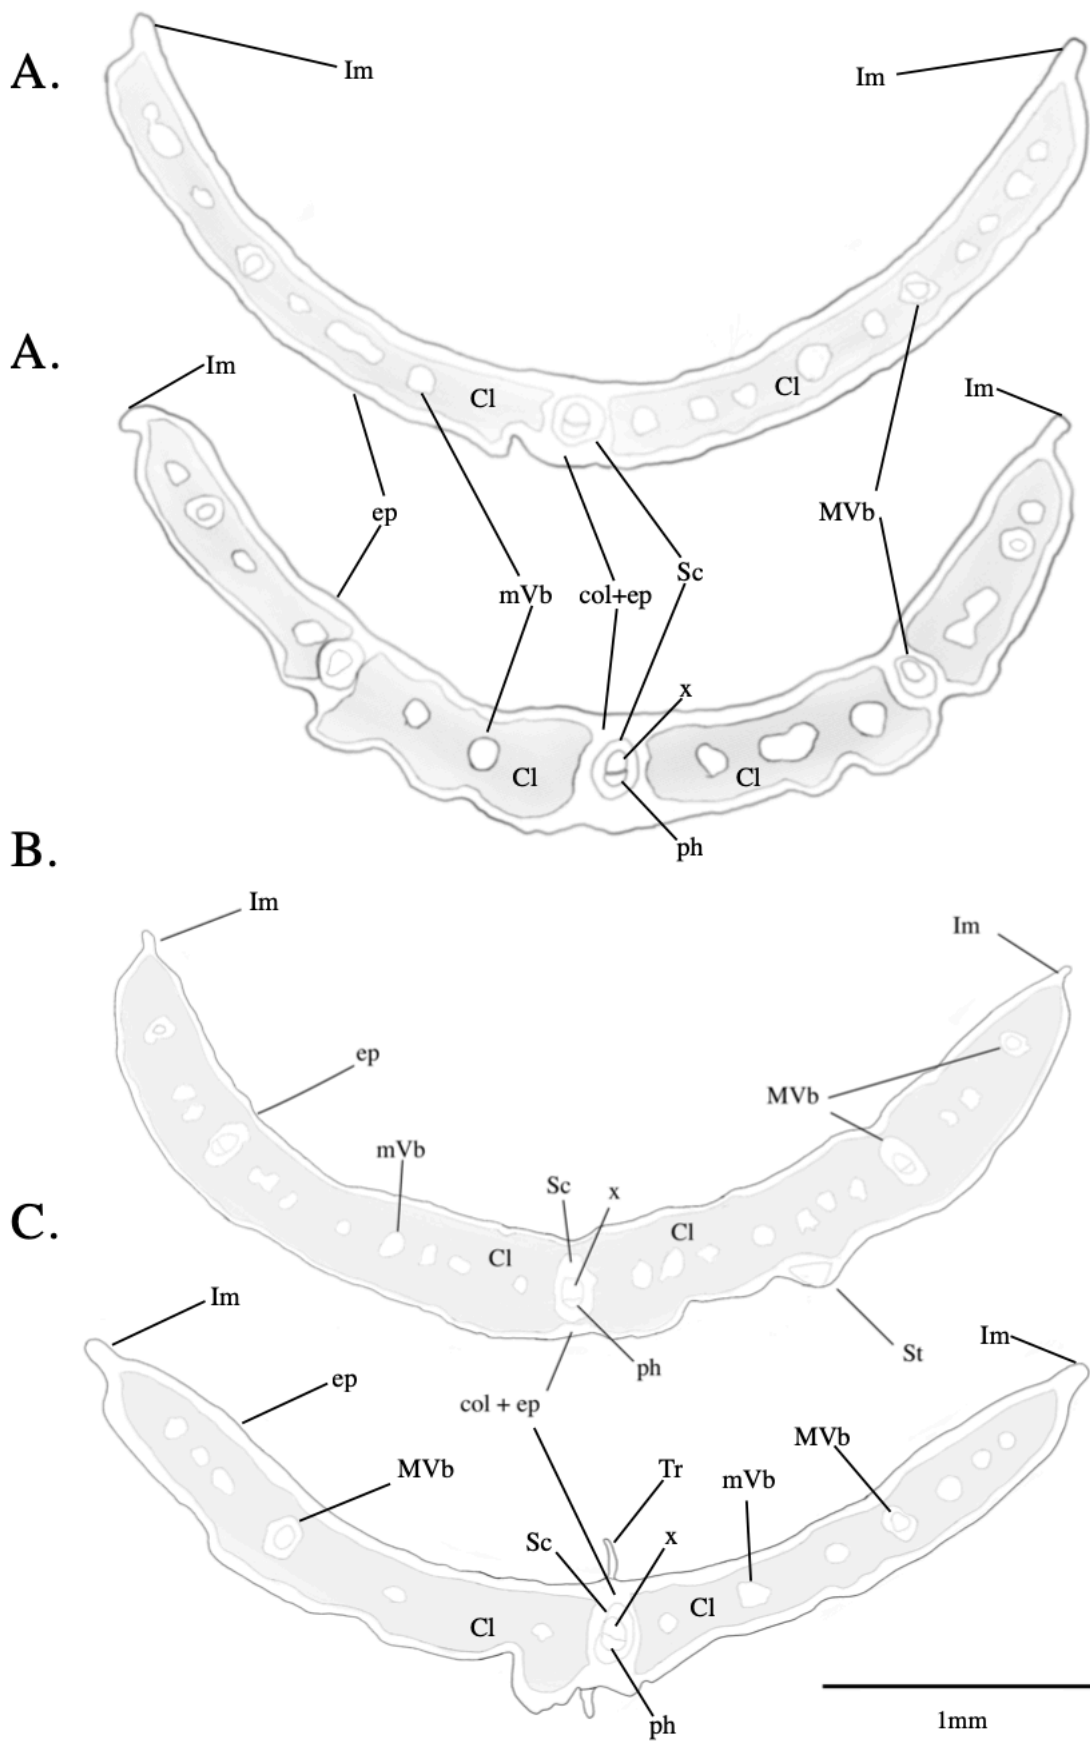

[continued]



D.

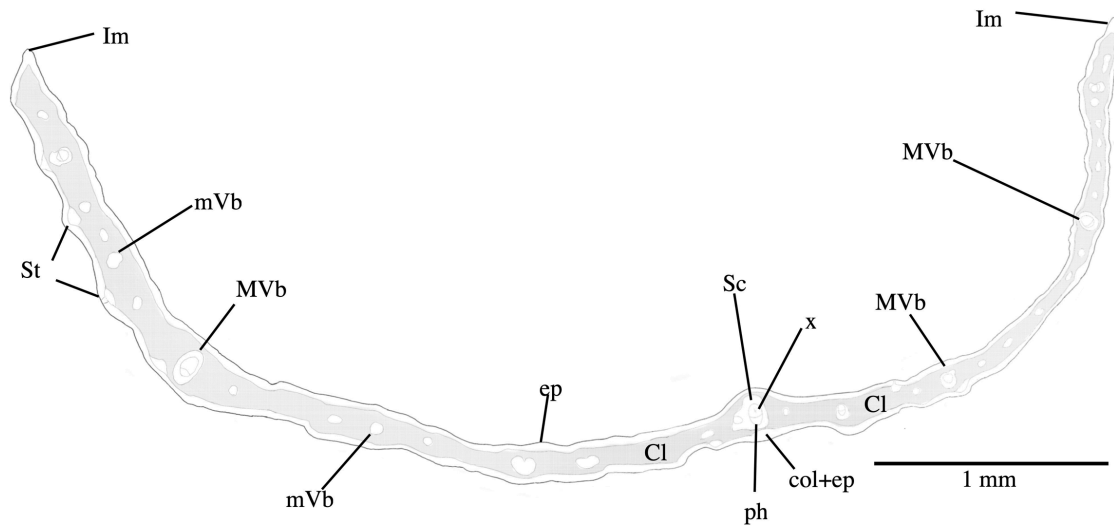

**Figure S2.** Schematic drawings of selected summer leaf cross sections from the type localities of the four putative *Armeria arenaria* subspecies. A. Two cross sections from LA (individuals LA13 and LA06), the topotypical population of *Armeria arenaria* subsp. *marginata*. B. Cross section from FB (individual FB14), the topotypical population of *A. arenaria* s.str. C. Cross section from MB (MB10), the topotypical population of *Armeria arenaria* subsp. *apennina*. D. Cross section from LL (individual LL10), the topotypical population of *Armeria arenaria* subsp. *praecox*. Population codes as in Table 1. Im = hyaline margin, MVb = main vascular bundles, mVb = minor vascular bundles, ep = epidermis, Cl = chlorenchyma, x = xylem, ph = phloem, Sc = sclerenchyma, col = collenchyma, St = Stomata, Tr = trichome.

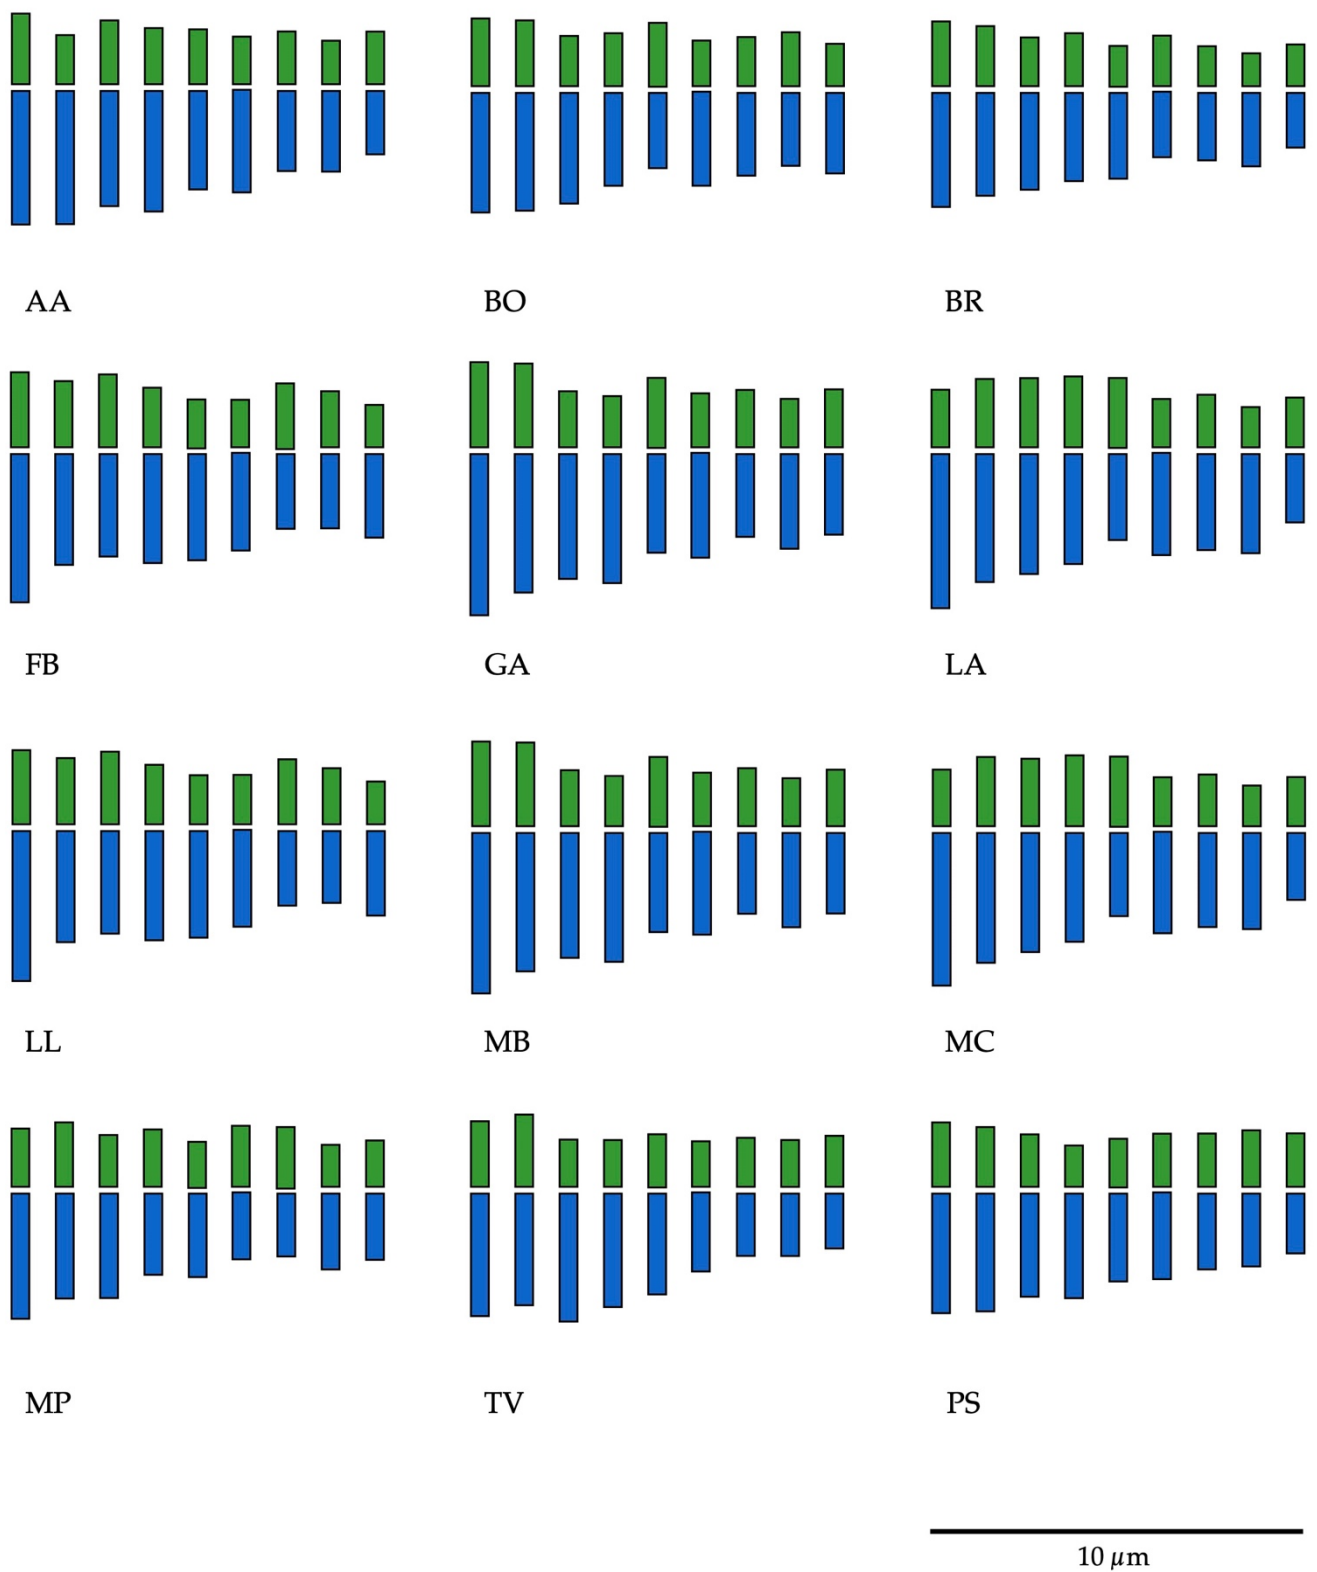

**Figure S3.** Haploid idiograms ( $x = 9$ ) of the twelve populations studied. Green = short arm; Blue = long arm. Scale bar is indicated at the bottom right. Population codes as in Table 1.

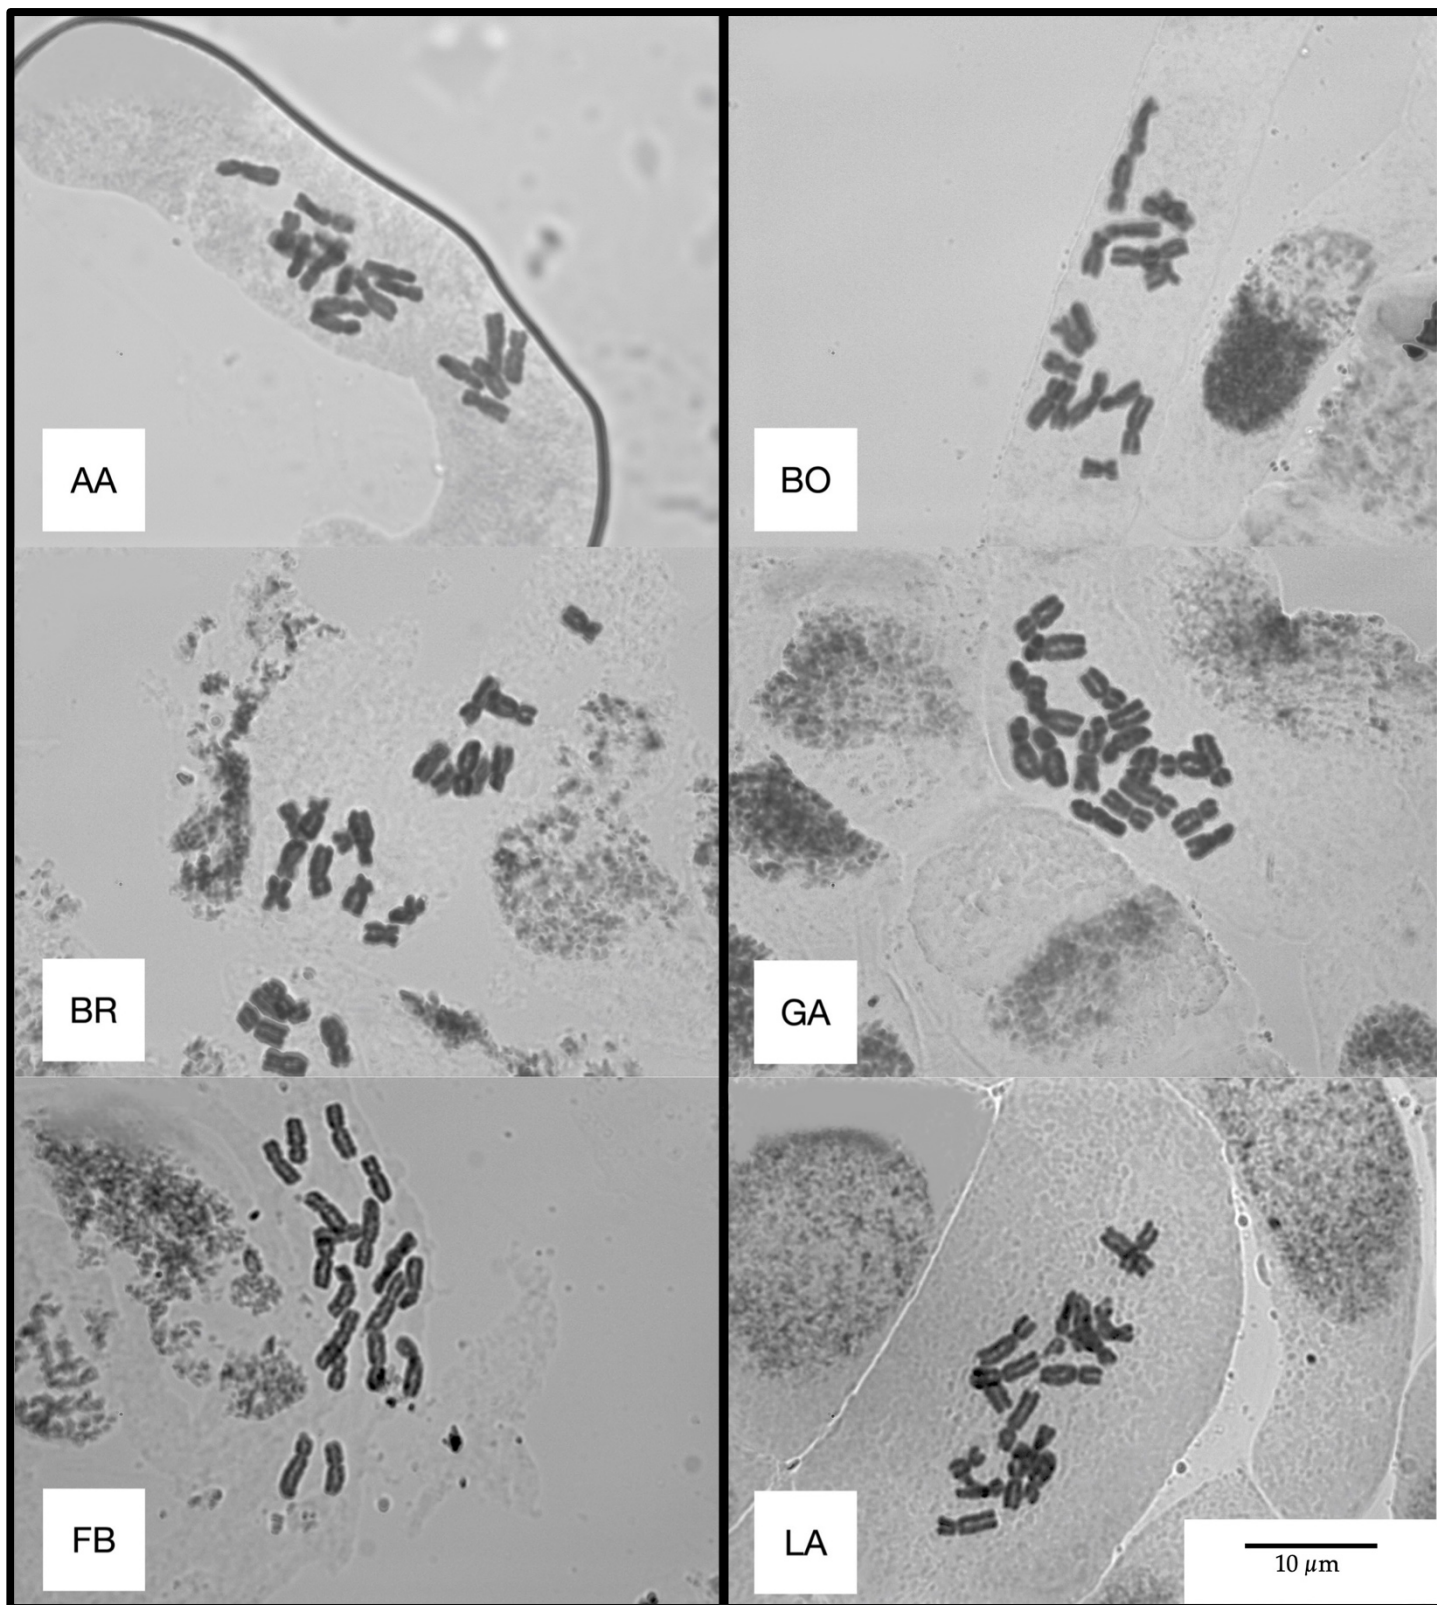

[continued]

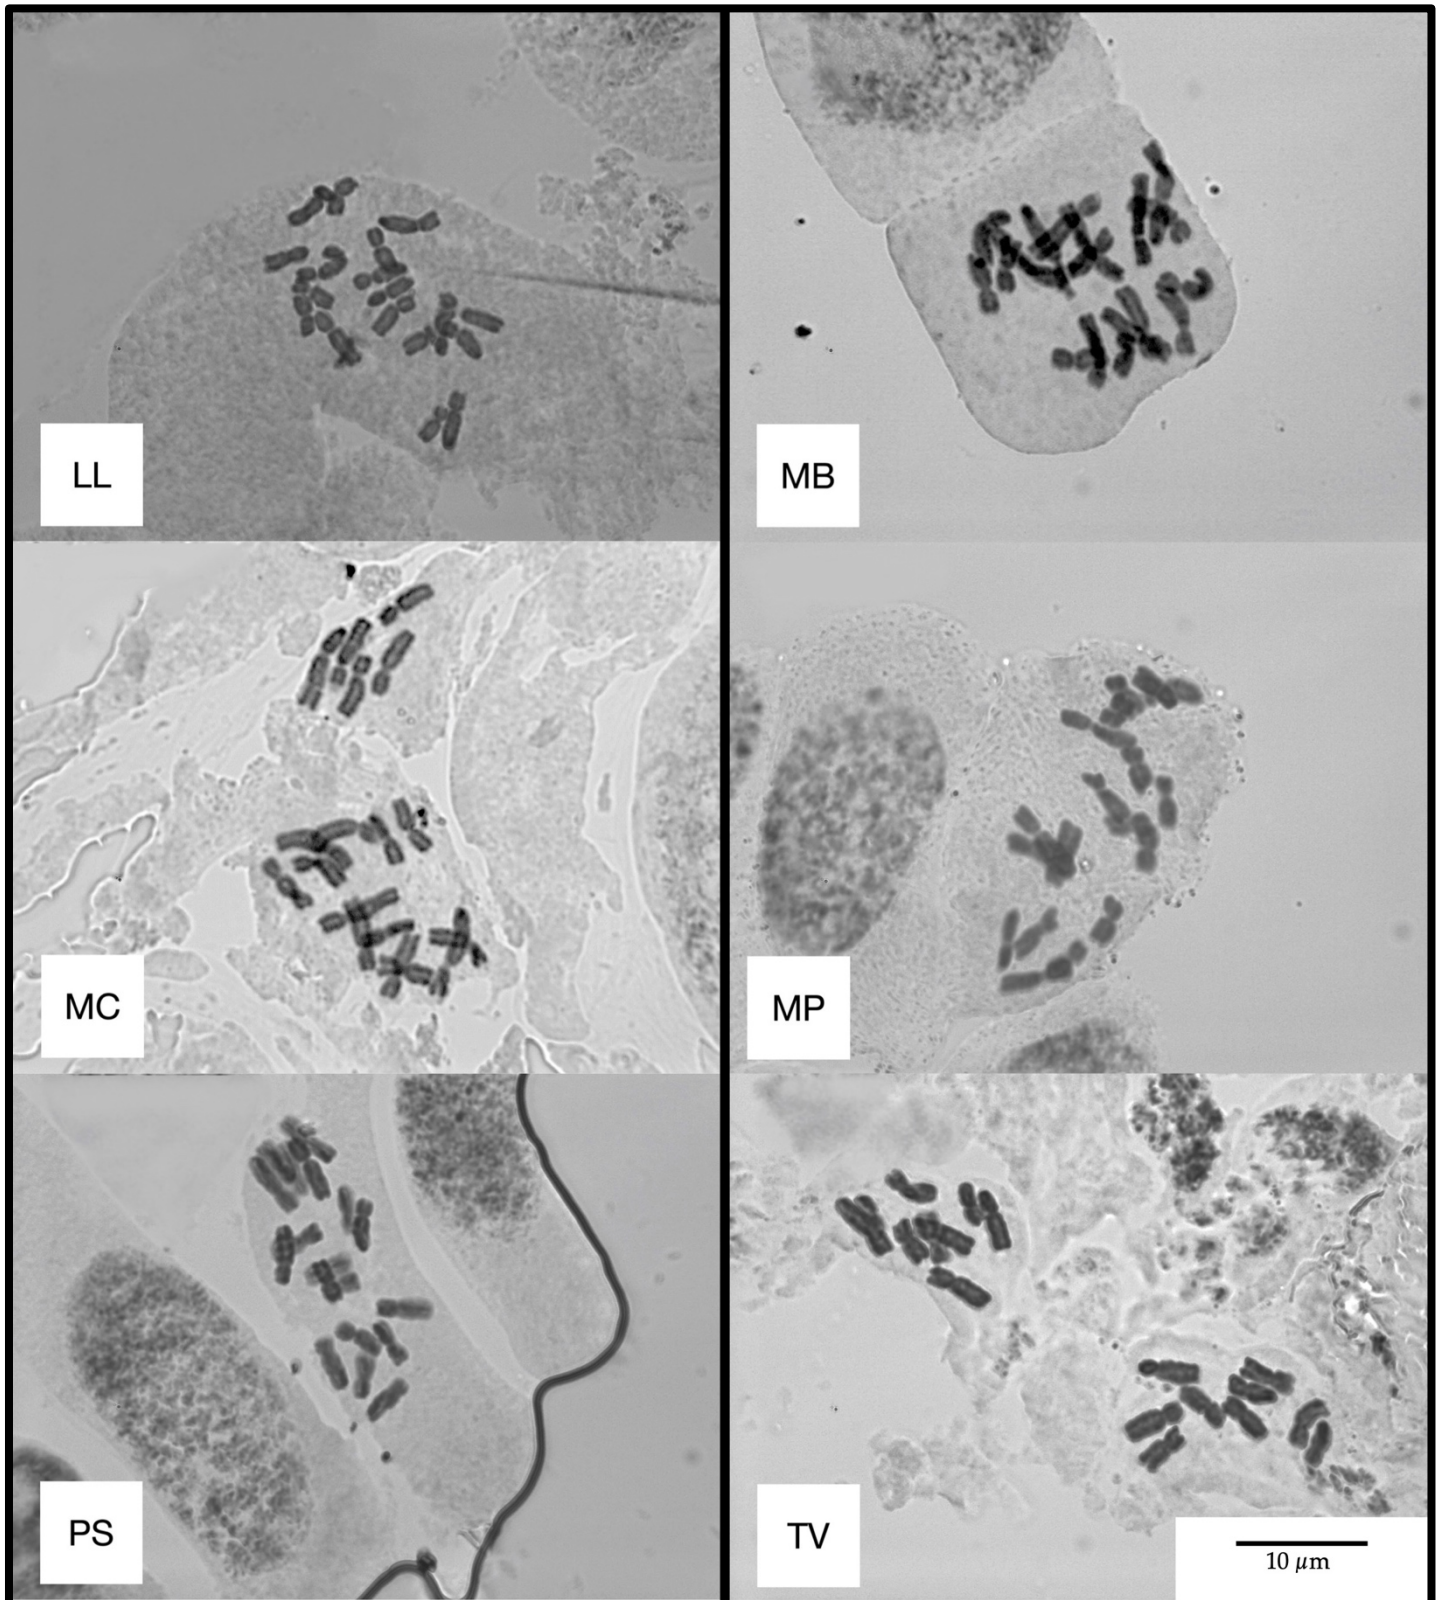

**Figure S4.** Selected metaphasic plates of the twelve populations studied. Scale bar is indicated at the bottom right. Population codes as in Table 1.



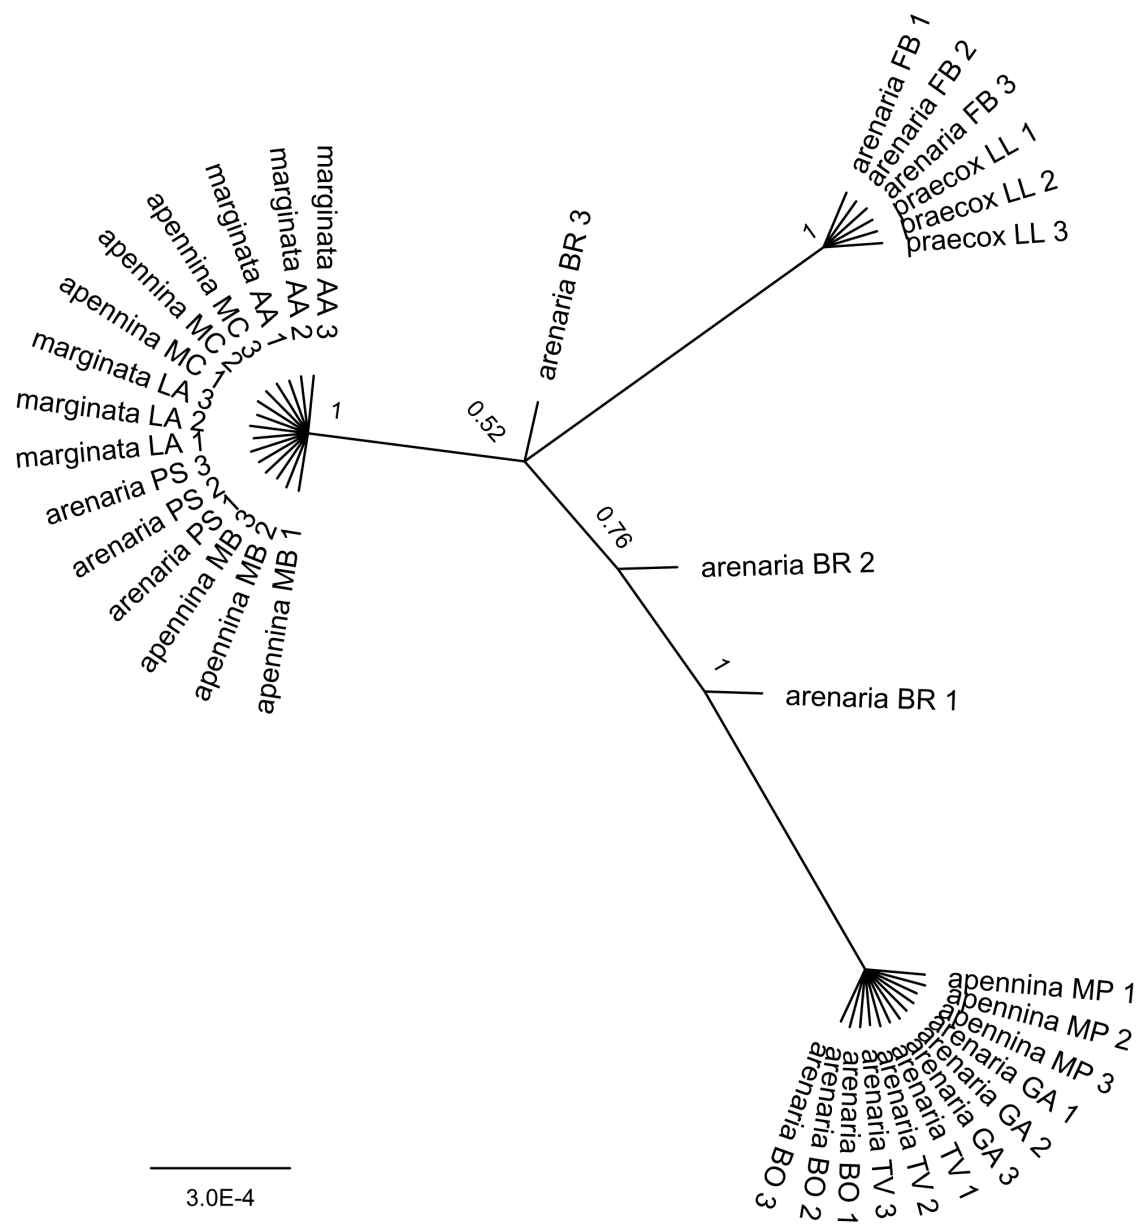

**Figure S5.** Bayesian unrooted consensus phylogenetic tree of ITS matrix. AA = Apuan Alps, N Apennines; BO = Bobbio, N Apennines; BR = Brusson, Pennine Alps; FB = Fontainebleau, Île-de-France; GA = Gambolò, West Po Valley; LA = Libro Aperto, N Apennines; LL = Le Lauzet, Dauphiné Alps; MB = Marmagna-Braiola, N Apennines; MC = Monte Cusna, N Apennines; MP = Monte Prinzera, N Apennines; PS = Piana di Salmezza, Lombard Prealps; TV = Terme di Valdieri, Maritime Alps. Further population details are provided in Table 1 and Figure 6 of the main text.

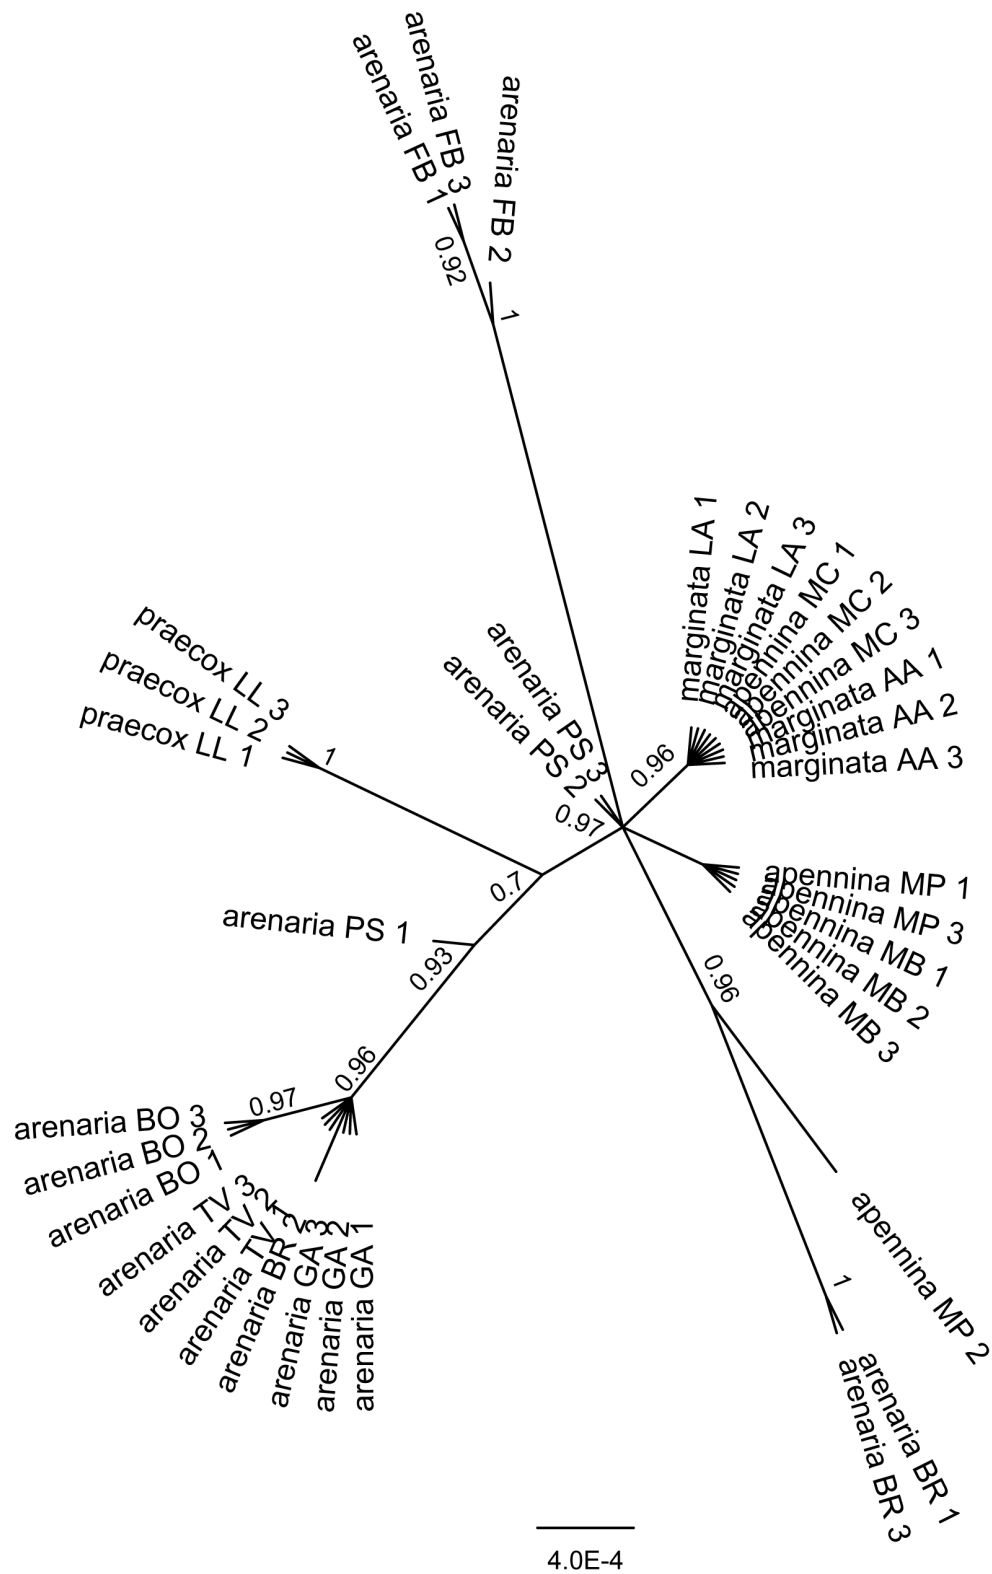

**Figure S6.** Bayesian unrooted consensus phylogenetic tree of plastid matrix. AA = Apuan Alps, N Apennines; BO = Bobbio, N Apennines; BR = Brusson, Pennine Alps; FB = Fontainebleau, Île-de-France; GA = Gambolò, West Po Valley; LA = Libro Aperto, N Apennines; LL = Le Lauzet, Dauphiné Alps; MB = Marmagna-Braiola, N Apennines; MC = Monte Cusna, N Apennines; MP = Monte Prinzer, N Apennines; PS = Piana di Salmezza, Lombard Prealps; TV = Terme di Valdieri, Maritime Alps. Further population details are provided in Table 1 and Figure 6 of the main text.
